# Supplementary material for: A Compact Control System to Enable Automated Operation of Microfluidic Bioanalytical Assays
Source: Biosensors (Basel). 2022 Dec 13;12(12):1160. doi: 10.3390/bios12121160 (PMC9775492; doi:10.3390/bios12121160)
Supplement: Supplementary file 1 [file biosensors-12-01160-s001.zip › biosensors-1931779-supplementary.pdf]

## Supporting Information for

# **A Compact Control System to Enable Automated Operation of Microfluidic Bioanalytical Assays**

**Alan M. Gonzalez-Suarez<sup>1\*</sup>, Alexander Long<sup>1,2</sup>, XuHai Huang<sup>1</sup> and Alexander Revzin<sup>1\*</sup>**

*<sup>1</sup>Department of Physiology and Biomedical Engineering, Mayo Clinic, Rochester, MN 55901, USA*

*<sup>2</sup>Department of Biology, St. Olaf College, Northfield, MN, 55057, USA*

\*Corresponding authors: GonzalezSuarez.Alan@mayo.edu, Revzin.Alexander@mayo.edu

## CONTENTS

### *Supplementary Figures*

|                                                                          |           |
|--------------------------------------------------------------------------|-----------|
| <b>Figure S1.</b> Glucose assay steps in the microfluidic device .....   | <b>S3</b> |
| <b>Figure S2.</b> Pressure systems stability as a function of time ..... | <b>S4</b> |
| <b>Figure S3.</b> Onboard PCB Schematic .....                            | <b>S5</b> |

### *Supplementary Tables*

|                                               |           |
|-----------------------------------------------|-----------|
| <b>Table S1.</b> Calibration curve data ..... | <b>S6</b> |
| <b>Table S2.</b> Blood samples data .....     | <b>S6</b> |

### *Bill of Materials*

|                                                                                |            |
|--------------------------------------------------------------------------------|------------|
| <b>1.</b> Components of the microfluidics control system .....                 | <b>S7</b>  |
| <b>2.</b> PCB components for the microfluidics control system (main PCB) ..... | <b>S8</b>  |
| <b>3.</b> Pressure regulator components .....                                  | <b>S9</b>  |
| <b>4.</b> Tubing and fittings (non-exhaustive) .....                           | <b>S11</b> |

## SUPPLEMENTARY FIGURES

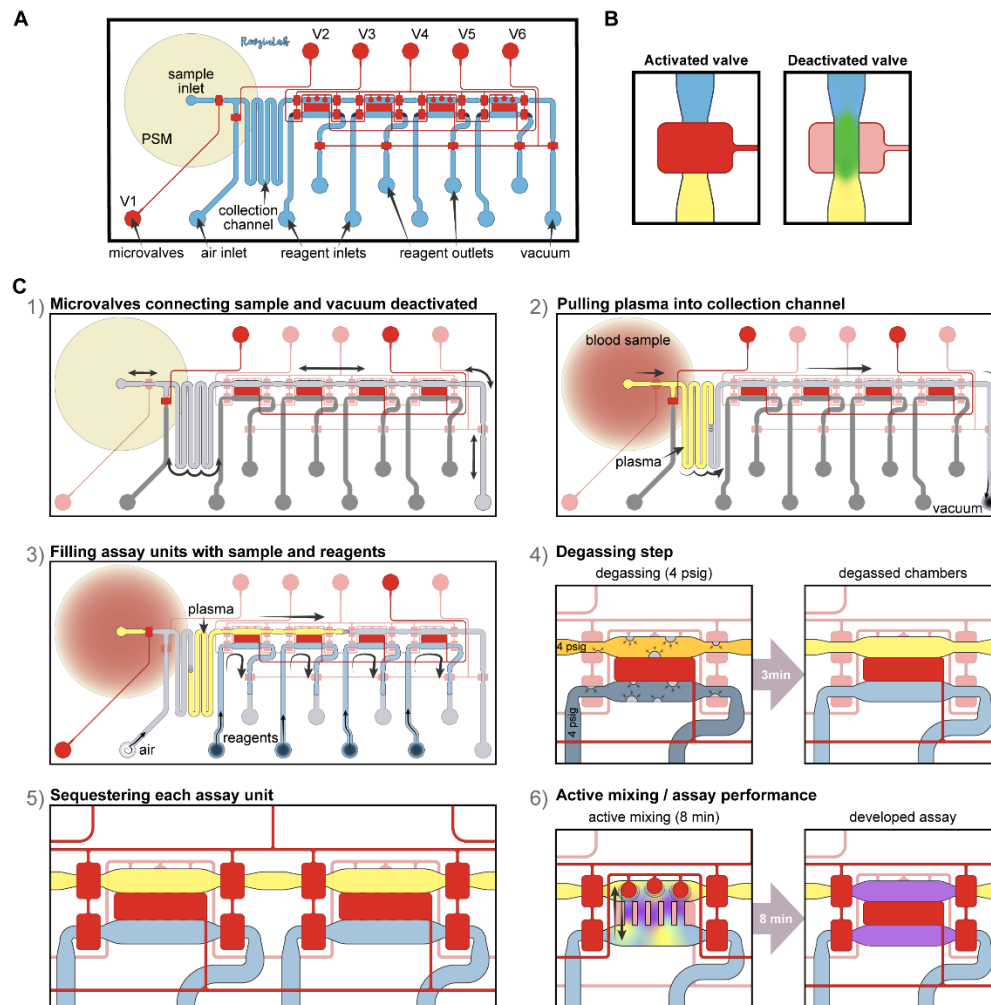

**Figure S1. Glucose assay steps in the microfluidic device.** **A)** Schematic of the microfluidic device with incorporated microvalves and the PSM. **B)** Activated and deactivated states of the microvalves for schematics shown in C). **C)** Steps performed in the microfluidic device by the control box to develop a glucose assay in a blood sample. This protocol starts with all microvalves activated. (1) First, the microvalves V1, V3, V4 and V6 are deactivated to allow communication from the sample inlet to the vacuum port. (2) The blood sample is deposited in the PSM and -1 psig applied to the vacuum port to pull the plasma into the collection channel. (3) The microvalve V1 is activated and V2 deactivated. Following this, 1 psig are applied to the air and reagents inlets to push the plasma and reagents into the sample and reagents chambers, respectively. (4) The microvalve V6 is activated, closing all outlets, and 4 psig are applied at the air and reagents inlets. This step removes any air bubbles trapped inside the assay chambers. (5) The microvalves V2 and V4 are activated to sequester each assay unit independently and prevent cross contamination between adjacent chambers. (6) The contents of the sample and reagents chambers are actively mixed for 8 min to develop the glucose enzymatic reaction. For this, the microvalves V3 and V5 are activated and deactivated sequentially every 100 ms, resulting in a fully developed reaction after the 8 minutes. After this, images of all assay units are acquired.

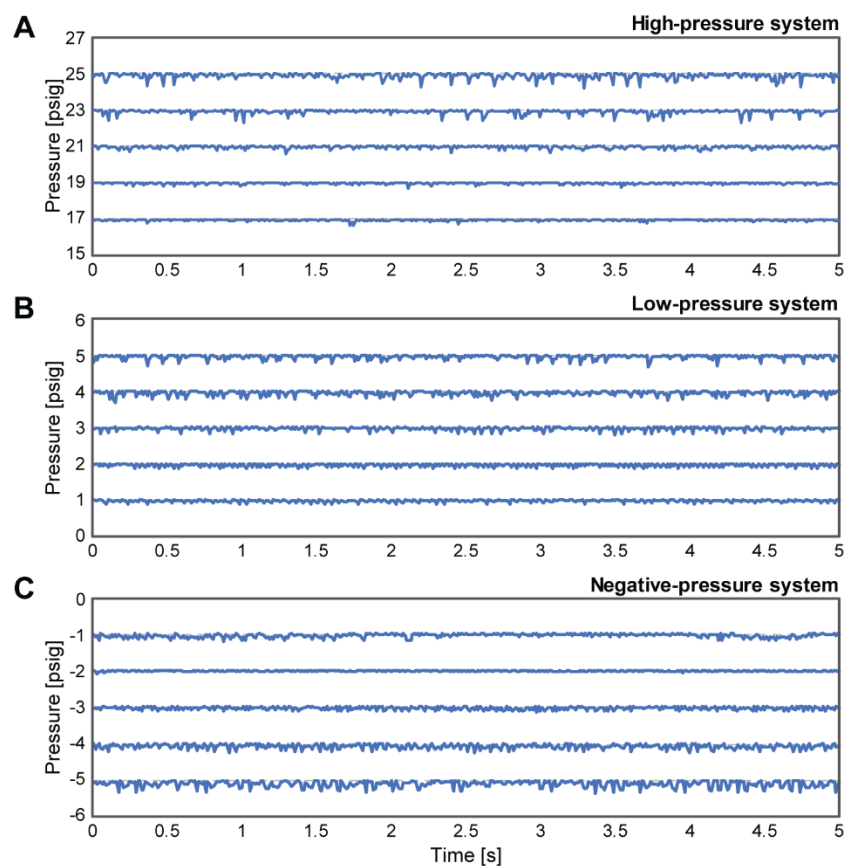

**Figure S2. Pressure systems stability as a function of time.** **A)** Graph showing the stability of the high-pressure system for up to 25 psig. **B)** Stability of the low-pressure system from 0 to a maximum pressure of 5 psig. **C)** Stability of the second branch of the low-pressure system that provides negative pressure ranging from 0 to -5 psig.

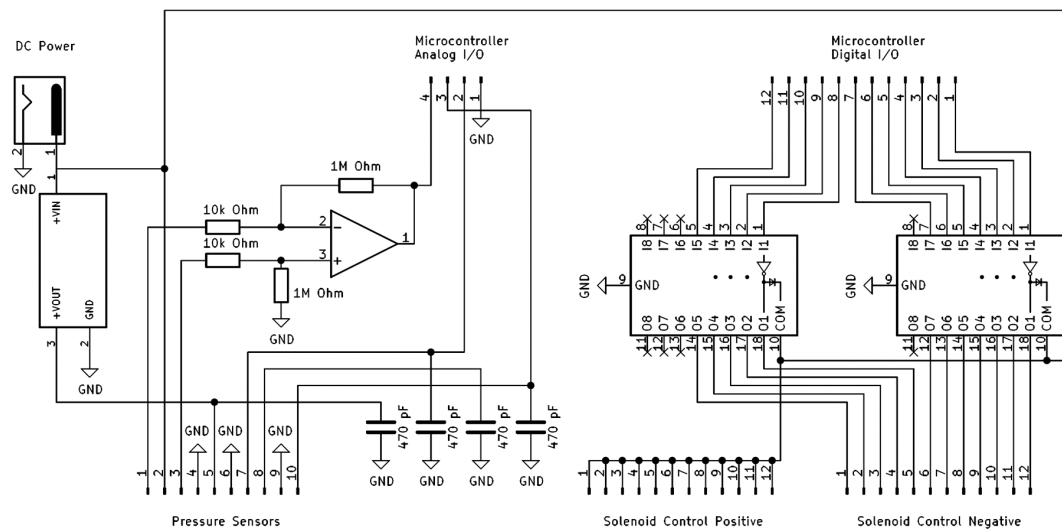

**Figure S3. Onboard PCB schematic.** Electrical schematic of the onboard PCB for controlling the solenoid valves and pressure sources. The PCB shows connections from the microcontroller to two amplifiers to power up the solenoid valves, and connections to receive the readings coming from the pressure sensors. The system is powered up with an external 12V power source.

## SUPPLEMENTARY TABLES

**Table S1. Calibration curve data.** Information obtained from the glucose calibration curve experiment shown in **Figure 7B**, showing the average magenta color intensity from the microfluidic chambers. The standard deviation was calculated from three technical replicates ( $n = 3$ ).

| Concentration [mM] | Mean Intensity [mM] | Std. dev. |
|--------------------|---------------------|-----------|
| 10                 | 18.226              | 0.244     |
| 5                  | 8.684               | 0.065     |
| 2.5                | 4.158               | 0.011     |
| 1.25               | 1.985               | 0.012     |
| 0.625              | 0.842               | 0.010     |
| 0.313              | 0.354               | 0.004     |
| 0.156              | 0.149               | 0.002     |
| 0                  | -0.033              | 0.003     |

**Table S2. Blood samples data.** Values obtained from glucose analysis in blood when comparing our microfluidic system against a commercial kit. Five blood samples were analyzed, and the data plotted is shown in **Figure 7C**. The standard deviation was obtained by analyzing three technical replicates ( $n = 3$ ).

| Sample | Commercial kit [mM] | Microfluidics [mM] | Std. dev. |
|--------|---------------------|--------------------|-----------|
| 1      | 3.744               | 3.856              | 0.077     |
| 2      | 1.969               | 2.004              | 0.053     |
| 3      | 2.585               | 2.825              | 0.049     |
| 4      | 4.300               | 3.972              | 0.095     |
| 5      | 3.543               | 3.588              | 0.072     |

## Components of the microfluidics control system

This document lists all components needed to build a microfluidics control system. It is organized in several sheets. This sheet lists the components for the overall system; the BOMs for the main PCB and the pressure regulator are listed in their own sheets, as is a list of necessary fittings and tubes to connect all components.

| Description                      | Supplier      | Supplier part number            | Quantity | Unit price (USD) | Extended price (USD) | Notes                                                                                                                                                                                       |
|----------------------------------|---------------|---------------------------------|----------|------------------|----------------------|---------------------------------------------------------------------------------------------------------------------------------------------------------------------------------------------|
| Printed circuit board, assembled |               |                                 | 1        | 70.87            | 70.87                |                                                                                                                                                                                             |
| Pump, 12V DC, 32 psi             | Amazon        | B0192KPBACK                     | 1        | 21.65            | 21.65                | Alternatively: Parker #H085-11 pump (\$99) + Parker 00329-10-A45S mount (\$14). 2 pumps can also be used, in case a vacuum supply is needed.                                                |
| Moisture filter                  | McMaster-Carr | 41575K61                        | 1        | 13.74            | 13.74                | Place after pump to prevent build up of water in tubes                                                                                                                                      |
| Pressure regulators              |               |                                 | 2        | 200.825          | 401.65               | Alternatively, Parker pressure controllers (e.g. 990-005103-015) can be used; however, they will need a larger pressure supply than the on-board pump                                       |
| Solenoid valves                  | Pneumadyne    | S10MM-31-12-2,<br>S10MM-30-12-2 | 32       | 27.49            | 879.68               | Part numbers refer to normally-open and normally-closed valves, respectively. Either can be used, depending on application. But you cannot have both NO and NC valves on the same manifold. |
| Manifold for valves, 8 stations  | Pneumadyne    | MSV10-8                         | 4        | 25.41            | 101.64               |                                                                                                                                                                                             |
| Check valve                      | Pneumadyne    | C050401                         | 1        | 5.68             | 5.68                 | Place after pump, to prevent large oscillations in pressure when pump is running                                                                                                            |
| 10-32 UNF plug (25-pack)         | Pneumadyne    | SPG-10                          | 0        | 13.25            | 0                    | Plugs for unused manifold stations. Not necessary if getting equal number of valves and manifold stations.                                                                                  |
| Cover plates for manifolds       | Pneumadyne    | MSV10-CP                        | 0        | 5.06             | 0                    |                                                                                                                                                                                             |
| Tubing, misc. fittings           | McMaster-Carr | Various                         |          |                  | 169.86               | See details on 'Tubing and fittings' sheet.                                                                                                                                                 |
| M3 screws, standoffs             | Amazon        | B06XQ33Y9X                      | 1        | 11.99            | 11.99                | Provided as example; M3 standoffs are useful for mounting the PCBs and some other components; all holes are M3 threaded or clearance.                                                       |
| M3 anti-vibration screws         | Amazon        | B071WBZC9K                      | 1        | 7.88             | 7.88                 | Useful when mounting the pump, to absorb vibration                                                                                                                                          |
| AC -> 12V DC adapter             | Amazon        | B015G8E7JU                      | 1        | 16.99            | 16.99                | 12V, 5A minimum supply                                                                                                                                                                      |
| Enclosure                        | eBay          | 122068688371                    | 1        | 26.27            | 26.27                | Cheval Group, Model #: 2U-D1-W2.<br><a href="http://www.chevalgrp.com/standalone.php">http://www.chevalgrp.com/standalone.php</a> ; alternatively, build custom enclosure                   |
|                                  |               |                                 |          | <b>Total:</b>    | <b>1727.9</b>        |                                                                                                                                                                                             |

## PCB components for the microfluidics control system (main PCB)

Also includes connectors for components that plug into the PCB

| Description                                  | Ref.               | Supplier      | Supplier part number  | Quantity | Unit price (USD) | Extended price (USD) | Notes                                                                                       |
|----------------------------------------------|--------------------|---------------|-----------------------|----------|------------------|----------------------|---------------------------------------------------------------------------------------------|
| PCB                                          |                    | DirtyPCBs.com | n/a                   | 1        | 29               | 29                   | Unit price listed is for 10 boards. Extended price reflects this.                           |
| ESP32 dev kit C                              | E1                 | Amazon        | B01N0SB08Q            | 1        | 12.95            | 12.95                |                                                                                             |
| Step-up converter, 24V out                   |                    | Amazon        | B06XWSV89D            | 0        | 10.99            | 0                    | Includes 5 units. Only necessary if using 24V pressure regulators (Parker OEM / VSO series) |
| IO expander (PCA9698)                        | U6                 | Digikey       | 568-3241-5-ND         | 1        | 4.53             | 4.53                 |                                                                                             |
| Darlington arrays (ULN2803A)                 | U1, U2, U3, U4, U5 | Digikey       | 296-15777-1-ND        | 5        | 1.53             | 7.65                 |                                                                                             |
| Quad Op-Amp (TLV2374)                        | U8                 | Digikey       | 296-11967-1-ND        | 1        | 2.01             | 2.01                 |                                                                                             |
| DC-DC converter, 5V out (Recom R-78E5.0-1.0) | U7                 | Digikey       | 945-2201-ND           | 1        | 3.26             | 3.26                 |                                                                                             |
| <b>Connectors</b>                            |                    |               |                       |          |                  |                      |                                                                                             |
| Barrel jack                                  | J1                 | Digikey       | CP-063AH-ND           | 1        | 1.36             | 1.36                 |                                                                                             |
| 5x2 header                                   | J3, J4, J5, J8     | Digikey       | ED1543-ND             | 4        | 0.29             | 1.16                 |                                                                                             |
| 2x1 header, locking                          | J6,J7              | Digikey       | A1921-ND              | 2        | 0.12             | 0.24                 |                                                                                             |
| 2x1 receptacle                               |                    | Digikey       | A31017-ND             | 2        | 0.18             | 0.36                 | Connector for pump                                                                          |
| 4x1 header, locking                          | J9,J10,J11         | Digikey       | A19431-ND             | 3        | 0.19             | 0.57                 |                                                                                             |
| 4x1 receptacle                               |                    | Digikey       | A31004-ND             | 3        | 0.36             | 1.08                 | Connector for Parker pressure regulators                                                    |
| 5x2 connector set                            |                    | Amazon        | B00W8U8CSC            | 1        | 4.99             | 4.99                 | Connector for solenoid valves                                                               |
| <b>Resistors</b>                             |                    |               |                       |          |                  |                      |                                                                                             |
| 1k6, 0603                                    | R1, R2             | Digikey       | P1.60KHCT-ND          | 3        | 0.1              | 0.3                  | Part numbers can of course change; any 0603 resistors with 1% tolerance can be used         |
| 1k8, 0603                                    | R5, R6, R7, R9     | Digikey       | MCT0603-1.80K-CFCT-ND | 6        | 0.152            | 0.912                |                                                                                             |
| 2k7, 0603                                    | R3, R4             | Digikey       | RHM2.70KADCT-ND       | 3        | 0.14             | 0.42                 |                                                                                             |
| 3k3, 0603                                    | R8, R10            | Digikey       | 311-3.30KHRDKR-ND     | 3        | 0.026            | 0.078                |                                                                                             |
| <b>Total</b>                                 |                    |               |                       |          |                  | <b>70.87</b>         |                                                                                             |

## Pressure regulator components

Number of pressure regulators **2**

| Component / value                                                 | Ref.        | Supplier      | Supplier part #       | Qty per board | Total qty | Unit price (USD) | Extended price (USD) | Notes                                                                               |
|-------------------------------------------------------------------|-------------|---------------|-----------------------|---------------|-----------|------------------|----------------------|-------------------------------------------------------------------------------------|
| Unit price listed is for 10 boards. Extended price reflects this. |             |               |                       |               |           |                  |                      |                                                                                     |
| PCB                                                               |             | DirtyPCBs.com |                       | 1             | 2         | 11.95            | 11.95                |                                                                                     |
| Connectors                                                        |             |               |                       |               |           |                  |                      |                                                                                     |
| 4x2 female angled                                                 | J3          | Digikey       | S5518-ND              | 1             | 2         | 0.96             | 1.92                 |                                                                                     |
| 2x1 female angled                                                 | J4          | Digikey       | S5438-ND              | 1             | 2         | 0.43             | 0.86                 |                                                                                     |
| USB micro B                                                       | J1          | Mouser        | 798-ZX62D-B-5PA830    | 1             | 2         | 0.7              | 1.4                  |                                                                                     |
| Diodes                                                            |             |               |                       |               |           |                  |                      |                                                                                     |
| Diodes, SOD-323                                                   | D1,D2,D3, C | Mouser        | 621-1N4148WS-F        | 3             | 6         | 0.156            | 0.936                |                                                                                     |
| Green LED, 0603                                                   | D4          | Mouser        | 604-APHD1608LCGCK     | 1             | 2         | 0.46             | 0.92                 |                                                                                     |
| Schottky diodes, SOD-323                                          | D6, D7      | Mouser        | 863-NSR0530HT1G       | 2             | 4         | 0.142            | 0.568                |                                                                                     |
| IC                                                                |             |               |                       |               |           |                  |                      |                                                                                     |
| Atmega32u4                                                        | U3          | Mouser        | 556-ATMEGA32U4-AU     | 1             | 2         | 4.8              | 9.6                  |                                                                                     |
| MOSFET, Dual N-channel                                            | Q1          | Mouser        | 621-DMN6070SSD-13     | 1             | 2         | 0.53             | 1.06                 |                                                                                     |
| Misc                                                              |             |               |                       |               |           |                  |                      |                                                                                     |
| Polyfuse                                                          | F1          | Digikey       | F2902CT-ND            | 1             | 2         | 1.06             | 2.12                 |                                                                                     |
| Switch, B3U-1000P                                                 | SW1         | Mouser        | 653-B3U-1000P         | 1             | 2         | 0.97             | 1.94                 |                                                                                     |
| Crystal, 8MHz                                                     | Y1          | Mouser        | 520-8.0-18-23G-JGNT   | 1             | 2         | 0.73             | 1.46                 |                                                                                     |
| Voltage regulators                                                |             |               |                       |               |           |                  |                      |                                                                                     |
| 3.3V out                                                          | U1          | Mouser        | 595-TLV76033DBZT      | 1             | 2         | 0.41             | 0.82                 |                                                                                     |
| 5V out                                                            | U2          | Mouser        | 595-TLV76050DBZT      | 1             | 2         | 0.41             | 0.82                 |                                                                                     |
| Capacitors                                                        |             |               |                       |               |           |                  |                      |                                                                                     |
| 0.1uF, 0603                                                       | C1          | Digikey       | 1276-1013-1-ND        | 1             | 2         | 0.1              | 0.2                  |                                                                                     |
| 1uF, 0603                                                         | C2,C7 ,C9   | Digikey       | 1276-1946-1-ND        | 3             | 6         | 0.1              | 0.6                  |                                                                                     |
| 10uF, 0805                                                        | C3          | Digikey       | 1276-6456-1-ND        | 1             | 2         | 0.15             | 0.3                  |                                                                                     |
| 18pF, 0603                                                        | C4,C5       | Digikey       | 399-7866-1-ND         | 2             | 4         | 0.12             | 0.48                 |                                                                                     |
| Resistors                                                         |             |               |                       |               |           |                  |                      |                                                                                     |
| 22, 0603                                                          | R1,R2       | Digikey       | 1276-4511-1-ND        | 2             | 4         | 0.033            | 0.132                |                                                                                     |
| 10k, 0603                                                         | R3          | Digikey       | RHM10KADCT-ND         | 1             | 2         | 0.14             | 0.28                 |                                                                                     |
| 3k2, 0603                                                         | R4          | Digikey       | 311-3.24KHRCT-ND      | 1             | 2         | 0.1              | 0.2                  | Part numbers can of course change; any 0603 resistors with 1% tolerance can be used |
| 1k8, 0603                                                         | R5          | Digikey       | MCT0603-1.80K-CFCT-ND | 1             | 2         | 0.152            | 0.304                |                                                                                     |
| 2k7, 0603                                                         | R6          | Digikey       | RHM2.70KADCT-ND       | 1             | 2         | 0.14             | 0.28                 |                                                                                     |
| 680, 0603                                                         | R7          | Digikey       | P680HCT-ND            | 1             | 2         | 0.1              | 0.2                  |                                                                                     |

|                                  |       |        |                     |               |   |                |                                                                                                                                                                      |
|----------------------------------|-------|--------|---------------------|---------------|---|----------------|----------------------------------------------------------------------------------------------------------------------------------------------------------------------|
|                                  |       |        |                     |               |   |                | Various options available. Any Honeywell HSC or SSC series sensor with an analog or SPI interface and 8-pin DIP package will work. Supply voltage can be 3.3V or 5V. |
| Pressure sensor                  | U4/U5 | Mouser | 785-HSCDRRT030PGAA5 | 1             | 2 | 37.15          | 74.3                                                                                                                                                                 |
| <b>Non-PCB components</b>        |       |        |                     |               |   |                |                                                                                                                                                                      |
| Parker VSO LowPro                |       | Parker | 935-300120-000      | 2             | 4 | 70             | 280                                                                                                                                                                  |
|                                  |       |        |                     |               |   |                | 12V valves are recommended, but 5V and 24V will also work.                                                                                                           |
| Manifold, machined 6061 aluminum |       |        |                     | 1             | 2 | 2              | 4                                                                                                                                                                    |
|                                  |       |        |                     |               |   |                | Price can vary a lot between making the manifold oneself (~2\$ in materials) and outsourcing its manufacturing (~300\$ for our first prototype). Use 6061 aluminum.  |
| Enclosure, 3D printed            |       |        |                     | 1             | 2 | 2              | 4                                                                                                                                                                    |
|                                  |       |        |                     |               |   |                | Price is approximate; depends on cost of filament and machine use (if any)                                                                                           |
|                                  |       |        |                     | <b>Total:</b> |   | <b>200.825</b> | <b>401.65</b>                                                                                                                                                        |

## Tubing and fittings (non-exhaustive)

The connections are, roughly: Pump -> 1/4" ID tubing -> 1/4"-1/8" reducer -> 1/8" ID tubing -> Moisture filter -> check valve -> (Y-splitter if using several regulators) -> pressure regulator(s) -> Valve manifolds. Each valve outlet is connected with 3/32" ID tubing to luer lock connectors -> stainless steel needles (20 gauge) -> 1/32" ID tubing -> needles -> chip.

Luer lock connectors are recommended as a way to quickly connect and disconnect tubing. They are suitable for the pressures used here (< 35 psi (2.4 atm))

| Description                                                                       | Supplier      | Supplier part number | Quantity | Unit price (USD) | Extended price (USD) | Notes                                                                                                                                                                                                                                     |
|-----------------------------------------------------------------------------------|---------------|----------------------|----------|------------------|----------------------|-------------------------------------------------------------------------------------------------------------------------------------------------------------------------------------------------------------------------------------------|
| Luer lock coupling, male, for 3/32" tubing. Pack of 10                            | McMaster-Carr | 51525K122            | 4        | 4.13             | 16.52                |                                                                                                                                                                                                                                           |
| Luer lock coupling, male, for 1/8" tubing. Pack of 10                             | McMaster-Carr | 51525K123            | 1        | 4.13             | 4.13                 |                                                                                                                                                                                                                                           |
| Luer lock coupling, female, for 1/8" tubing. Pack of 10                           | McMaster-Carr | 51525K213            | 1        | 3.67             | 3.67                 |                                                                                                                                                                                                                                           |
| Luer lock coupling, male, for 1/4" tubing. Pack of 10                             | McMaster-Carr | 51525K126            | 1        | 4.13             | 4.13                 |                                                                                                                                                                                                                                           |
| Luer lock coupling, female, for 1/4" tubing. Pack of 10                           | McMaster-Carr | 51525K216            | 1        | 4.03             | 4.03                 |                                                                                                                                                                                                                                           |
| Stainless Steel Dispensing Needle with Luer Lock Connection, 20 gauge. Pack of 50 | McMaster-Carr | 75165A677            | 1        | 12.15            | 12.15                | 20 gauge = 0.026" ID / 0.036" OD. (0.66/0.91mm). These are used to connect the valves to the 1/32" tubing; additionally, the needle part of these can be extracted easily (with pliers) and used to connect the 1/32" tubing to the chip. |
| Plastic Barbed Tube Fitting, Y connector, for 1/8" ID tubing. Pack of 10          | McMaster-Carr | 5463K118             | 1        | 7.37             | 7.37                 | Splitter between pump and two pressure controllers                                                                                                                                                                                        |
| Tygon tubing, firm. 3/32" ID, 5/32" OD. 10ft                                      | McMaster-Carr | 5239K25              | 1        | 11.7             | 11.7                 | For valve outlets. Place male luer lock connectors on other side.                                                                                                                                                                         |
| Tygon tubing, soft. 1/32" ID, 3/32" OD. 50ft.                                     | McMaster-Carr | 5155T11              | 1        | 12.5             | 12.5                 | Valves -> chip                                                                                                                                                                                                                            |
| PTFE tubing, 25ft. 1/32" ID, 1/16" OD                                             | McMaster-Carr | 5239K23              | 1        | 25               | 25                   | Valves -> chip. PTFE tubing is recommended for use with cells; otherwise, use tygon which is cheaper and more flexible (easier to work with).                                                                                             |
| Tygon tubing, firm. 1/8" ID, 1/4" OD. 10ft.                                       | McMaster-Carr | 5103K32              | 1        | 14.8             | 14.8                 | Pumps -> Pressure regulators -> Manifolds. Firm tubing is recommended to avoid leaks.                                                                                                                                                     |
| Tygon tubing, firm. 1/4" ID, 3/8" OD. 5ft.                                        | McMaster-Carr | 5103K34              | 1        | 9.15             | 9.15                 |                                                                                                                                                                                                                                           |
| Thread-to-barb fittings, 10-32 UNF to 3/32" barb. 25/pack                         | Pneumadyne    | EB25                 | 2        | 14               | 28                   | For valve outlets                                                                                                                                                                                                                         |
| Thread-to-barb fittings, 10-32 UNF to 1/8" barb. 25/pack                          | Pneumadyne    | EB30                 | 1        | 14               | 14                   | For pressure regulator in/out and manifold inputs                                                                                                                                                                                         |
| 10-32 socket set screws, pack of 25                                               | McMaster-Carr | 94355A330            | 1        | 2.71             | 2.71                 | For plugging unused port on pressure regulators                                                                                                                                                                                           |
| <b>Total</b>                                                                      |               |                      |          |                  | <b>169.86</b>        |                                                                                                                                                                                                                                           |
